# Supplementary material for: Intention Attribution in Children and Adolescents with Autism Spectrum Disorder: An EEG Study
Source: Springer Nature journal article supplement (doi:10.1007/s10803-021-05358-1), 2021-12-02
Supplement: MOESM1 [file 19924578]

## Supplementary Material

Article Title: "Intention Attribution in Youth with Autism Spectrum Disorder: an EEG Study"

Journal of Autism and Developmental Disorders

Magdalena Schütz, Sara Boxhoorn, Andreas Mühlherr, Hannah Mössinger, Christine M. Freitag<sup>#</sup> & Christina Luckhardt<sup>#</sup>

Corresponding author: Magdalena Schütz

Department of Child and Adolescent Psychiatry, Psychosomatics and Psychotherapy, Autism Research and Intervention Center of Excellence, University Hospital Frankfurt, Goethe University, Frankfurt am Main, Germany

E-Mail: Magdalena.Schuetz@kgu.de

**Supplement 1:** Mean ( $\pm$ SD) number of trials remaining for analysis for each group and condition

|            | <b>3<sup>rd</sup> Image</b>  |                           | <b>4<sup>th</sup> Image</b>  |                     |                           |                     |
|------------|------------------------------|---------------------------|------------------------------|---------------------|---------------------------|---------------------|
|            | <b>Intention Attribution</b> | <b>Physical Causality</b> | <b>Intention Attribution</b> |                     | <b>Physical Causality</b> |                     |
|            |                              |                           | <b>Congruous</b>             | <b>Incongruous</b>  | <b>Congruous</b>          | <b>Incongruous</b>  |
| <b>ASD</b> | 24.60 ( $\pm$ 2.41)          | 24.80 ( $\pm$ 3.33)       | 12.70 ( $\pm$ 1.56)          | 12.35 ( $\pm$ 1.90) | 12.70 ( $\pm$ 1.98)       | 13.05 ( $\pm$ 1.79) |
| <b>TD</b>  | 25.75 ( $\pm$ 2.77)          | 27.25 ( $\pm$ 2.24)       | 13.50 ( $\pm$ 1.64)          | 13.50 ( $\pm$ 1.40) | 13.50 ( $\pm$ 1.61)       | 13.90 ( $\pm$ 1.07) |

Note. ASD = Autism Spectrum Disorder; TD = Typically Developing. Group differences reached significance for the Physical Causality condition during the 3<sup>rd</sup> image ( $T(1,38) = -2.762$ ;  $p = 0.01$ ).

**Supplement 2A:** Mean ( $\pm$ SD) area ( $\mu$ V\*ms), 200 – 600 ms, parietal clusters, 3<sup>rd</sup> image

| <b>Hemisphere</b> | <b>Intention Attribution</b> |                    | <b>Physical Causality</b> |                    |
|-------------------|------------------------------|--------------------|---------------------------|--------------------|
|                   | <b>left</b>                  | <b>right</b>       | <b>left</b>               | <b>right</b>       |
| <b>ASD</b>        | 4.03 ( $\pm$ 3.76)           | 4.09 ( $\pm$ 4.58) | 2.36 ( $\pm$ 2.78)        | 3.09 ( $\pm$ 3.62) |
| <b>TD</b>         | 3.60 ( $\pm$ 2.57)           | 3.78 ( $\pm$ 2.56) | 2.61 ( $\pm$ 1.70)        | 3.29 ( $\pm$ 2.94) |

Note. ASD = Autism Spectrum Disorder; TD = Typically Developing

**Supplement 2B:** Multivariate tests, 200 – 600 ms, parietal clusters, 3<sup>rd</sup> image

|                                       | <b>F (1, 38)</b> | <b>p</b> | <b><math>\eta^2</math></b> |
|---------------------------------------|------------------|----------|----------------------------|
| <b>Condition</b>                      | 0.827            | 0.369    | 0.021                      |
| <b>Condition * IQ</b>                 | 0.248            | 0.621    | 0.006                      |
| <b>Condition * Group</b>              | 1.761            | 0.192    | 0.044                      |
| <b>Hemisphere</b>                     | 0.134            | 0.716    | 0.004                      |
| <b>Hemisphere * IQ</b>                | 0.043            | 0.836    | 0.001                      |
| <b>Hemisphere * Group</b>             | 0.067            | 0.797    | 0.002                      |
| <b>Condition * Hemisphere</b>         | 1.404            | 0.243    | 0.036                      |
| <b>Condition * Hemisphere * IQ</b>    | 0.825            | 0.367    | 0.021                      |
| <b>Condition * Hemisphere * Group</b> | 0.055            | 0.816    | 0.001                      |
| <b>IQ</b>                             | 3.328            | 0.076    | 0.081                      |
| <b>Group</b>                          | 0.153            | 0.698    | 0.004                      |

**Supplement 2C:** Topographies and average ERP waveforms for the 3<sup>rd</sup> image (200 – 600 ms).

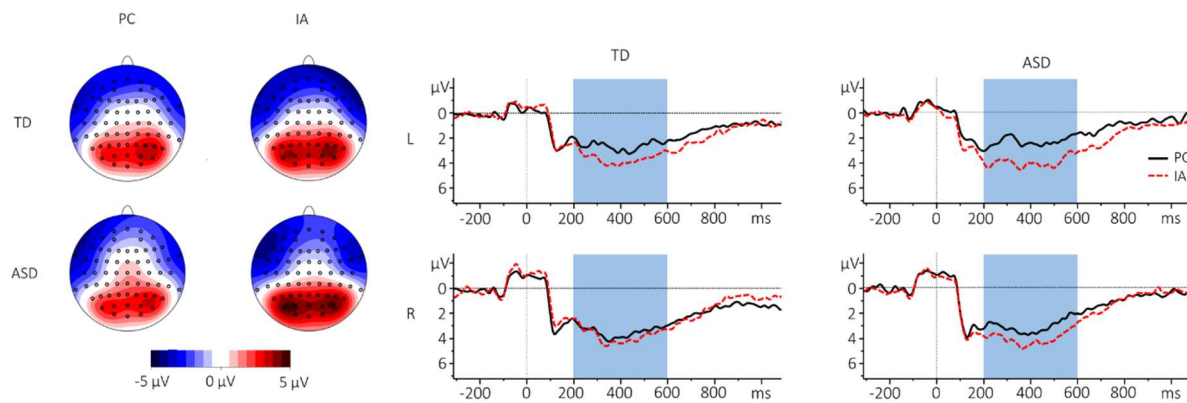

*Note.* Topographies for the 3<sup>rd</sup> image in the typically developing (TD) and Autism Spectrum Disorder (ASD) groups for physical causality (PC) and intention attribution (IA) during 200 – 600 ms after onset of the 3<sup>rd</sup> image. Grand average ERP waveforms show left (L) and right (R) parietal clusters for both groups and conditions. The time of interest is marked in blue.

**Supplement 3A:** Mean ( $\pm$ SD) area ( $\mu\text{V}\cdot\text{ms}$ ), 200 – 600 ms, parietal clusters, 4<sup>th</sup> image

| Ending     | <i>Intention Attribution</i> |                |                    |                | <i>Physical Causality</i> |                |                    |                |
|------------|------------------------------|----------------|--------------------|----------------|---------------------------|----------------|--------------------|----------------|
|            | <i>Congruous</i>             |                | <i>Incongruous</i> |                | <i>Congruous</i>          |                | <i>Incongruous</i> |                |
|            | <i>left</i>                  | <i>right</i>   | <i>left</i>        | <i>right</i>   | <i>left</i>               | <i>right</i>   | <i>left</i>        | <i>right</i>   |
| <b>ASD</b> | 3.74                         | 3.90           | 3.54               | 3.52           | 3.05                      | 3.60           | 3.37               | 3.70           |
|            | ( $\pm 4.98$ )               | ( $\pm 4.98$ ) | ( $\pm 4.32$ )     | ( $\pm 4.99$ ) | ( $\pm 3.77$ )            | ( $\pm 4.86$ ) | ( $\pm 3.33$ )     | ( $\pm 4.19$ ) |
| <b>TD</b>  | 3.73                         | 4.60           | 3.56               | 4.05           | 3.51                      | 4.47           | 2.99               | 4.19           |
|            | ( $\pm 2.65$ )               | ( $\pm 2.86$ ) | ( $\pm 2.70$ )     | ( $\pm 2.92$ ) | ( $\pm 2.59$ )            | ( $\pm 3.11$ ) | ( $\pm 2.50$ )     | ( $\pm 2.92$ ) |

*Note.* ASD = Autism Spectrum Disorder; TD = Typically Developing

**Supplement 3B:** Multivariate tests, 200 – 600 ms, parietal clusters, 4<sup>th</sup> image

|                                             | <i>F</i> (1, 38) | <i>p</i> | $\eta^2$ |
|---------------------------------------------|------------------|----------|----------|
| <i>Condition</i>                            | 5.70             | 0.455    | 0.015    |
| <i>Condition * IQ</i>                       | 0.757            | 0.390    | 0.020    |
| <i>Condition * Group</i>                    | 0.095            | 0.760    | 0.002    |
| <i>Ending</i>                               | 0.475            | 0.495    | 0.012    |
| <i>Ending * IQ</i>                          | 0.668            | 0.419    | 0.017    |
| <i>Ending * Group</i>                       | 0.627            | 0.433    | 0.016    |
| <i>Hemisphere</i>                           | 0.595            | 0.445    | 0.015    |
| <i>Hemisphere * IQ</i>                      | 0.358            | 0.553    | 0.009    |
| <i>Hemisphere * Group</i>                   | 1.230            | 0.274    | 0.031    |
| <i>Condition * Ending</i>                   | 0.183            | 0.671    | 0.005    |
| <i>Condition * Ending * IQ</i>              | 0.248            | 0.671    | 0.005    |
| <i>Condition * Ending * Group</i>           | 0.847            | 0.363    | 0.022    |
| <i>Condition * Hemisphere</i>               | 2.439            | 0.127    | 0.060    |
| <i>Condition * Hemisphere * IQ</i>          | 1.802            | 0.187    | 0.045    |
| <i>Condition * Hemisphere * Group</i>       | 0.137            | 0.713    | 0.004    |
| <i>Ending * Hemisphere</i>                  | 0.038            | 0.846    | 0.001    |
| <i>Ending * Hemisphere * IQ</i>             | 0.067            | 0.797    | 0.002    |
| <i>Ending * Hemisphere * Group</i>          | 0.131            | 0.719    | 0.003    |
| <i>Condition * Ending * Hemisphere</i>      | 1.156            | 0.289    | 0.030    |
| <i>Condition * Ending * Hemisphere * IQ</i> | 0.980            | 0.328    | 0.025    |
| <i>Condition * Ending * Hemisphere *</i>    | 1.556            | 0.220    | 0.039    |
| <i>Group</i>                                |                  |          |          |
| <i>IQ</i>                                   | 2.900            | 0.097    | 0.071    |
| <i>Group</i>                                | 0.511            | 0.479    | 0.013    |

**Supplement 3C.** Topographies and average ERP waveforms for the 4<sup>th</sup> image (200 – 600 ms)

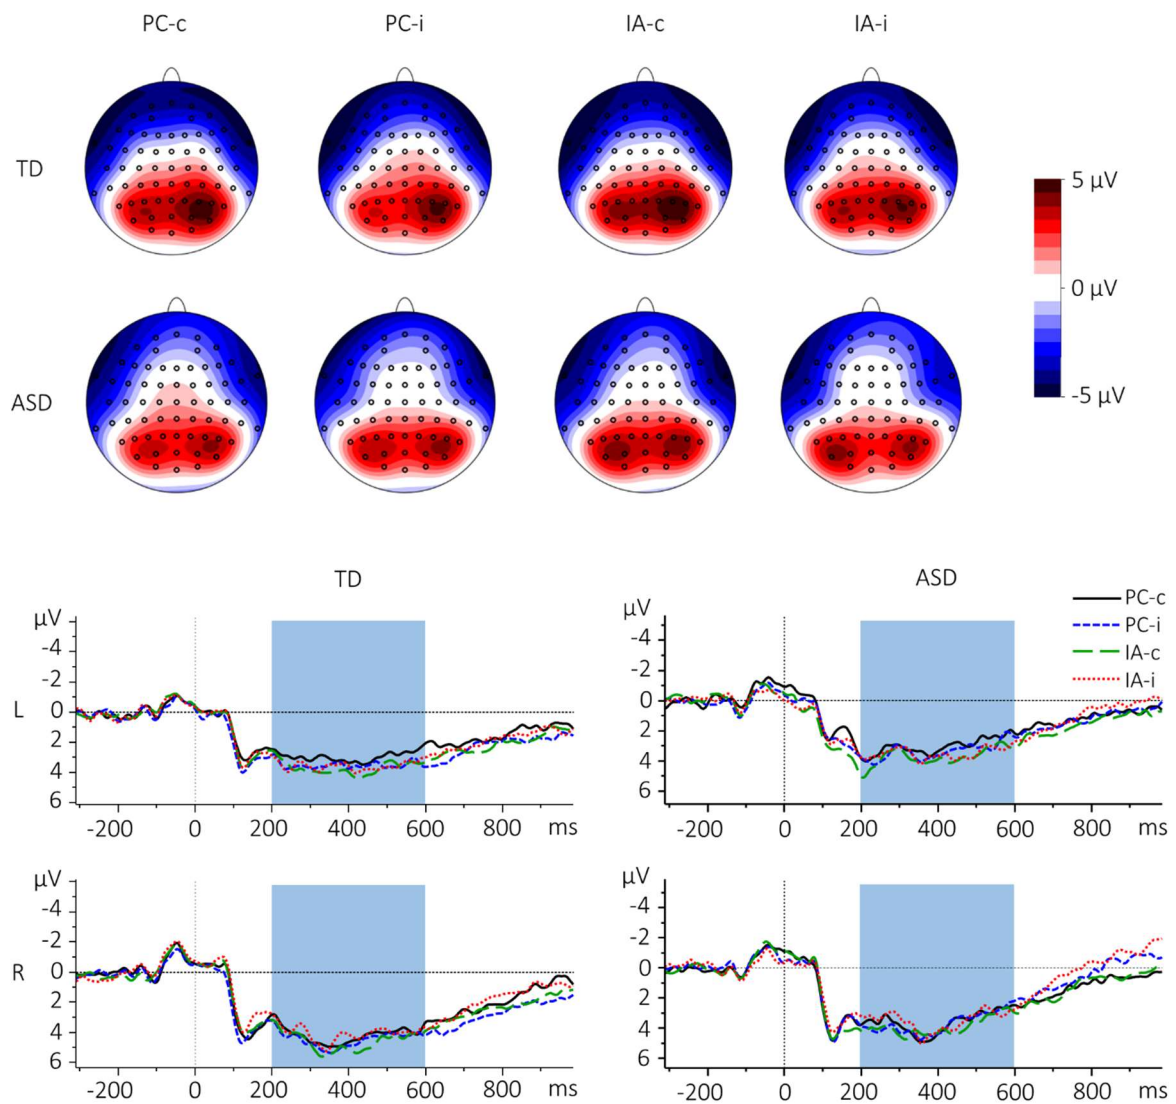

*Note.* Topographies in the typically developing (TD) and Autism Spectrum Disorder (ASD) groups for physical causality (PC) and intention attribution (IA) and correct (c) and incorrect (i) endings during 200 – 600 ms after onset of the 4th image. Grand average ERP waveforms show left (L) and right (R) parietal clusters for both groups, conditions and endings endings during 200 – 600 ms after onset of the 4th image. The time of interest is marked in blue.

**Supplement 4A:** Mean ( $\pm$ SD) area ( $\mu\text{V}\cdot\text{ms}$ ), 700 – 1200 ms, parietal clusters, 4<sup>th</sup> image

| Ending     | Intention Attribution |               |               |               | Physical Causality |               |               |               |
|------------|-----------------------|---------------|---------------|---------------|--------------------|---------------|---------------|---------------|
|            | Congruous             |               | Incongruous   |               | Congruous          |               | Incongruous   |               |
| Hemisphere | left                  | right         | left          | right         | left               | right         | left          | right         |
| <b>ASD</b> | 1.33                  | 1.20          | 0.99          | -0.22         | 0.97               | 1.19          | 1.31          | 0.47          |
|            | ( $\pm$ 1.51)         | ( $\pm$ 1.76) | ( $\pm$ 1.73) | ( $\pm$ 1.57) | ( $\pm$ 1.30)      | ( $\pm$ 1.15) | ( $\pm$ 1.58) | ( $\pm$ 0.98) |
| <b>TD</b>  | 1.75                  | 1.95          | 2.06          | 1.79          | 1.71               | 1.82          | 1.83          | 1.69          |
|            | ( $\pm$ 1.14)         | ( $\pm$ 1.38) | ( $\pm$ 1.37) | ( $\pm$ 1.73) | ( $\pm$ 1.24)      | ( $\pm$ 1.69) | ( $\pm$ 1.24) | ( $\pm$ 1.49) |

Note. ASD = Autism Spectrum Disorder; TD = Typically Developing

**Supplement 4B:** Multivariate tests, 700 – 1200 ms, parietal clusters, 4<sup>th</sup> image

|                                                    | <b><i>F (1, 38)</i></b> | <b><i>p</i></b> | <b><i><math>\eta^2</math></i></b> |
|----------------------------------------------------|-------------------------|-----------------|-----------------------------------|
| <b><i>Condition</i></b>                            | 1.683                   | 0.202           | 0.042                             |
| <b><i>Condition * IQ</i></b>                       | 1.662                   | 0.205           | 0.042                             |
| <b><i>Condition * Group</i></b>                    | 0.504                   | 0.482           | 0.013                             |
| <b><i>Ending</i></b>                               | 0.123                   | 0.728           | 0.003                             |
| <b><i>Ending * IQ</i></b>                          | 0.025                   | 0.874           | 0.001                             |
| <b><i>Ending * Group</i></b>                       | <b>4,673</b>            | <b>0.037*</b>   | <b>0.110</b>                      |
| <b><i>Hemisphere</i></b>                           | 0.060                   | 0.808           | 0.002                             |
| <b><i>Hemisphere * IQ</i></b>                      | 0.131                   | 0.720           | 0.003                             |
| <b><i>Hemisphere * Group</i></b>                   | 1.226                   | 0.275           | 0.031                             |
| <b><i>Condition * Ending</i></b>                   | 3.011                   | 0.091           | 0.073                             |
| <b><i>Condition * Ending * IQ</i></b>              | 3.541                   | 0.068           | 0.085                             |
| <b><i>Condition * Ending * Group</i></b>           | <b>4.430</b>            | <b>0.042*</b>   | <b>0.104</b>                      |
| <b><i>Condition * Hemisphere</i></b>               | 2.254                   | 0.133           | 0.058                             |
| <b><i>Condition * Hemisphere * IQ</i></b>          | 2.064                   | 0.159           | 0.052                             |
| <b><i>Condition * Hemisphere * Group</i></b>       | 0.394                   | 0.534           | 0.010                             |
| <b><i>Ending * Hemisphere</i></b>                  | 0.728                   | 0.399           | 0.019                             |
| <b><i>Ending * Hemisphere * IQ</i></b>             | 1.239                   | 0.027           | 0.032                             |
| <b><i>Ending * Hemisphere * Group</i></b>          | 2.329                   | 0.135           | 0.058                             |
| <b><i>Condition * Ending * Hemisphere</i></b>      | 0.055                   | 0.816           | 0.001                             |
| <b><i>Condition * Ending * Hemisphere * IQ</i></b> | 0.041                   | 0.841           | 0.001                             |
| <b><i>Condition * Ending * Hemisphere *</i></b>    | 0.092                   | 0.764           | 0.002                             |
| <b><i>Group</i></b>                                |                         |                 |                                   |
| <b><i>IQ</i></b>                                   | 2.322                   | 0.136           | 0.058                             |
| <b><i>Group</i></b>                                | <b>14.888</b>           | <b>0.000*</b>   | <b>0.282</b>                      |

Note. Significant effects are printed in bold and marked with an asterisk.

**Supplement 4C:** significant post-hoc comparisons for the Group\*Ending interaction in the parietal cluster

| <i>Effect (Mean ± SD)</i>                                       | <i>p</i> |
|-----------------------------------------------------------------|----------|
| $i_{ASD}$ (M = 0.64 ± 1.47 μV) < $c_{TD}$ (M = 1.81 ± 1.36 μV)  | < 0.001  |
| $i_{ASD}$ (M = 0.64 ± 1.47 μV) < $i_{TD}$ (M = 1.81 ± 1.46 μV)  | < 0.001  |
| $i_{ASD}$ (M = 0.64 ± 1.47 μV) < $c_{ASD}$ (M = 1.81 ± 1.43 μV) | 0.03     |

*Note.* ASD = Autism Spectrum Disorder; TD = Typically Developing; c= correct endings; i = incorrect endings.

**Supplement 4D:** significant post-hoc comparisons for the Group\*Condition\*Ending interaction in the parietal cluster

| <i>Effect (Mean ± SD)</i>                                             | <i>p</i> |
|-----------------------------------------------------------------------|----------|
| $IA-i_{ASD}$ (M = 0.38 ± 1.65 μV) < $IA-c_{TD}$ (M = 1.85 ± 1.26 μV)  | 0.01     |
| $IA-i_{ASD}$ (M = 0.38 ± 1.65 μV) < $IA-i_{TD}$ (M = 1.92 ± 1.55 μV)  | 0.01     |
| $IA-i_{ASD}$ (M = 0.38 ± 1.65 μV) < $PC-c_{TD}$ (M = 1.76 ± 1.47 μV)  | 0.03     |
| $IA-i_{ASD}$ (M = 0.38 ± 1.65 μV) < $PC-i_{TD}$ (M = 1.85 ± 1.37 μV)  | 0.03     |
| $IA-i_{ASD}$ (M = 0.38 ± 1.65 μV) < $IA-c_{ASD}$ (M = 1.85 ± 1.64 μV) | 0.01     |

*Note.* ASD = Autism Spectrum Disorder; TD = Typically Developing; c= correct endings; i = incorrect endings.

**Supplement 5A:** Mean (±SD) area (μV\*ms), 700 – 1200 ms, parietal clusters, 4<sup>th</sup> image

| <i>Ending</i> | <i>Intention Attribution</i> |                    | <i>Physical Causality</i> |                    |
|---------------|------------------------------|--------------------|---------------------------|--------------------|
|               | <i>Congruous</i>             | <i>Incongruous</i> | <i>Congruous</i>          | <i>Incongruous</i> |
| <b>ASD</b>    | 0.67 (±2.67)                 | 2.53 (±3.52)       | 0.81 (±1.92)              | 1.26 (±2.07)       |
| <b>TD</b>     | -0.53 (±1.41)                | 0.74 (±1.34)       | -0.93 (±1.78)             | 0.51 (±2.02)       |

*Note.* ASD = Autism Spectrum Disorder; TD = Typically Developing.

**Supplement 5B:** Multivariate tests, 700 – 1200 ms, parietal clusters, 4<sup>th</sup> image

|                                   | <i>F</i> (1, 38) | <i>p</i>      | $\eta^2$     |
|-----------------------------------|------------------|---------------|--------------|
| <b>Condition</b>                  | 0.144            | 0.706         | 0.004        |
| <b>Condition * IQ</b>             | 0.049            | 0.826         | 0.001        |
| <b>Condition * Group</b>          | 0.176            | 0.678         | 0.005        |
| <b>Ending</b>                     | 0.812            | 0.373         | 0.021        |
| <b>Ending * IQ</b>                | 1.720            | 0.198         | 0.043        |
| <b>Ending * Group</b>             | 0.001            | 0.976         | 0.000        |
| <b>Condition * Ending</b>         | 3.002            | 0.091         | 0.073        |
| <b>Condition * Ending * IQ</b>    | 3.568            | 0.067         | 0.086        |
| <b>Condition * Ending * Group</b> | <b>5.326</b>     | <b>0.027*</b> | <b>0.123</b> |
| <b>IQ</b>                         | 0.002            | 0.961         | 0.000        |
| <b>Group</b>                      | <b>6.763</b>     | <b>0.013*</b> | <b>0.151</b> |

Note. Significant effects are printed in bold and marked with an asterisk.

**Supplement 5C:** significant post-hoc comparisons for the Group\*Condition\*Ending interaction in the frontal cluster

| <b>Effects (Mean ± SD)</b>                                  | <b><i>p</i></b> |
|-------------------------------------------------------------|-----------------|
| IA-iASD (M = 2.53 ± 3.52 μV) > IA-CTD (M = -0.53 ± 1.41 μV) | 0.01            |
| IA-iASD (M = 2.53 ± 3.52 μV) > PC-CTD (M = -0.93 ± 1.78 μV) | 0.00            |
| IA-iASD (M = 2.53 ± 3.52 μV) > IA-CASD (M = 0.67 ± 2.67 μV) | 0.00            |
| IA-iASD (M = 2.53 ± 3.52 μV) > PC-CASD (M = 0.81 ± 1.92 μV) | 0.01            |
| IA-iTD (M = 0.74 ± 1.34 μV) > PC-CTD (M = -0.93 ± 1.78 μV)  | 0.01            |
| PC-iTD (M = 0.51 ± 2.02 μV) > PC-CTD (M = -0.93 ± 1.78 μV)  | 0.03            |

Note. ASD = Autism Spectrum Disorder; TD = Typically Developing; c= correct endings; i = incorrect endings.
